# Supplementary material for: The role of luteinizing hormone activity in spermatogenesis: from physiology to clinical practice
Source: Springer Nature journal article supplement (doi:10.1186/s12958-024-01333-4), 2025-01-13
Supplement: MOESM1 [file 12958_2024_1333_MOESM1_ESM.pdf]

## ONLINE SUPPLEMENT

---

Esteves SC\*, Humaidan P

### The role of luteinizing hormone activity in spermatogenesis: From physiology to clinical implications

**Supplemental Table 1.** Characteristics of commercially available human chorionic gonadotropin (hCG) preparations

| Proportion of total immunoreactivity (%) | Urinary-derived hCG <sup>a</sup> | Recombinant hCG |
|------------------------------------------|----------------------------------|-----------------|
| Intact bioactive hCG (%)                 | 50–96                            | >99             |
| Hyperglycosylated hCG (%)                | 0.5–4.0                          | <0.1            |
| Free beta subunit (%)                    | 2.4–8.0                          | <0.1            |
| Beta-core fragment <sup>b</sup> (%)      | 1.2–58.0                         | —               |
| Epidermal growth factor <sup>c</sup>     | 4–204                            | —               |

<sup>a</sup> Varies by brand.

<sup>b</sup> Degradation product of hCG.

<sup>c</sup> Epidermal growth factor is a contaminant (ng/5000 IU).

---

\* Corresponding author at [s.esteves@androfert.com.br](mailto:s.esteves@androfert.com.br)
